# Supplementary material
Source: ML conference proceedings conference paper supplement (https://proceedings.neurips.cc/paper_files/paper/2013/hash/c2aee86157b4a40b78132f1e71a9e6f1-Abstract.html)
Supplement: Supplementary file [file c2aee86157b4a40b78132f1e71a9e6f1-Supplemental.zip]

---

# DESPOT: Online POMDP Planning with Regularization

## Supplementary Material

---

**Adhiraj Somani    Nan Ye    David Hsu    Wee Sun Lee**  
 Department of Computer Science, National University of Singapore  
 adhirajsomani@gmail.com, {yenan, dyhsu, leews}@comp.nus.edu.sg

### 1 Proof of Theorem 1

We will need two lemmas for proving Theorem 1. The first one is Haussler's bound given in [1, p. 103] (Lemma 9, part (2)).

**Lemma 1** (Haussler's bound) *Let  $Z_1, \dots, Z_n$  be i.i.d random variables with range  $0 \leq Z_i \leq M$ ,  $\mathbb{E}(Z_i) = \mu$ , and  $\hat{\mu} = \frac{1}{n} \sum_{i=1}^n Z_i$ ,  $1 \leq i \leq n$ . Assume  $\nu > 0$  and  $0 < \alpha < 1$ . Then*

$$\Pr(d_\nu(\hat{\mu}, \mu) > \alpha) < 2e^{-\alpha^2 \nu n / M}$$

where  $d_\nu(r, s) = \frac{|r-s|}{\nu+r+s}$ . As a consequence,

$$\Pr\left(\mu < \frac{1-\alpha}{1+\alpha}\hat{\mu} - \frac{\alpha}{1+\alpha}\nu\right) < 2e^{-\alpha^2 \nu n / M}.$$

Let  $\Pi_i$  be the class of policy trees in  $\Pi_{b_0, D, K}$  and having size  $i$ . The next lemma bounds the size of  $\Pi_i$ .

**Lemma 2**  $|\Pi_i| \leq i^{(i-2)}(|A||Z|)^i$ .

**Proof.** Let  $\Pi'_i$  be the class of rooted ordered trees of size  $i$ .  $|\Pi'_i|$  is not more than the number of all trees with  $i$  labeled nodes, because the in-order labeling of a tree in  $\Pi'_i$  corresponds to a labeled tree. By Cayley's formula [3], the number of trees with  $i$  labeled nodes is  $i^{(i-2)}$ , thus  $|\Pi'_i| \leq i^{(i-2)}$ . Recall the definition of a policy derivable from a DESPOT in Section 4 in the main text. A policy tree in  $\Pi_i$  is obtained from a tree in  $\Pi'_i$  by assigning the default policy to each leaf node, one of the  $|A|$  possible action labels to all other nodes, and one of at most  $|Z|$  possible labels to each edge. Therefore

$$|\Pi_i| \leq i^{(i-2)} \cdot |A|^i \cdot |Z|^{(i-1)} \leq i^{(i-2)}(|A||Z|)^i.$$

□

In the following, we often abbreviate  $V_\pi(b_0)$  and  $\hat{V}_\pi(b_0)$  as  $V_\pi$  and  $\hat{V}_\pi$  respectively, since we will only consider the true and empirical values for a fixed but arbitrary  $b_0$ . Our proof follows a line of reasoning similar to [2].

**Theorem 1** *For any  $\tau, \alpha \in (0, 1)$  and any set  $\Phi_{b_0}$  of  $K$  randomly sampled scenarios for belief  $b_0$ , every policy tree  $\pi \in \Pi_{b_0, D, K}$  satisfies*

$$V_\pi(b_0) \geq \frac{1-\alpha}{1+\alpha}\hat{V}_\pi(b_0) - \frac{R_{\max}}{(1+\alpha)(1-\gamma)} \cdot \frac{\ln(4/\tau) + |\pi| \ln(KD|A||Z|)}{\alpha K}.$$

with probability at least  $1 - \tau$ , where  $\hat{V}_\pi(b_0)$  denotes the estimated value of  $\pi$  under  $\Phi_{b_0}$ .

**Proof.** Consider an arbitrary policy tree  $\pi \in \Pi_{b_0, D, K}$ . We know that for a random scenario  $\phi$  for the belief  $b_0$ , executing the policy  $\pi$  w.r.t.  $\phi$  gives us a sequence of states and observations distributed according to the distributions  $P(s'|s, a)$  and  $P(z|s, a)$ . Therefore, for  $\pi$ , its true value  $V_\pi$  equals  $\mathbb{E}(V_\pi, \phi)$ , where the expectation is over the distribution of scenarios. On the other hand, since  $\hat{V}_\pi = \frac{1}{K} \sum_{k=1}^K V_{\pi, \phi_k}$ , and the scenarios  $\phi_0, \phi_1, \dots, \phi_K$  are independently sampled, Lemma 1 gives

$$\Pr \left( V_\pi < \frac{1-\alpha}{1+\alpha} \hat{V}_\pi - \frac{\alpha}{1+\alpha} \epsilon_{|\pi|} \right) < 2e^{-\alpha^2 \epsilon_{|\pi|} K/M} \quad (1)$$

where  $M = R_{\max}/(1-\gamma)$ , and  $\epsilon_i$  is chosen such that

$$2e^{-\alpha^2 \epsilon_{|\pi|} K/M} = \tau/(2i^2 |\Pi_i|). \quad (2)$$

By the union bound, we have

$$\Pr \left( \exists \pi \in \Pi_{b_0, D, K} \left[ V_\pi < \frac{1-\alpha}{1+\alpha} \hat{V}_\pi - \frac{\alpha}{1+\alpha} \epsilon_{|\pi|} \right] \right) \leq \sum_{i=1}^{\infty} \sum_{\pi \in \Pi_i} \Pr \left( V_\pi < \frac{1-\alpha}{1+\alpha} \hat{V}_\pi - \frac{\alpha}{1+\alpha} \epsilon_{|\pi|} \right).$$

By the choice of  $\epsilon_i$ 's and Inequality (1), the right hand side of the above inequality is bounded by  $\sum_{i=1}^{\infty} |\Pi_i| \cdot [\tau/(2i^2 |\Pi_i|)] = \pi^2 \tau / 12 < \tau$ , where the well-known identity  $\sum_{i=1}^{\infty} 1/i^2 = \pi^2/6$  is used. Hence,

$$\Pr \left( \exists \pi \in \Pi_{b_0, D, K} \left[ V_\pi < \frac{1-\alpha}{1+\alpha} \hat{V}_\pi - \frac{\alpha}{1+\alpha} \epsilon_{|\pi|} \right] \right) < \tau. \quad (3)$$

Equivalently, with probability  $1 - \tau$ , every  $\pi \in \Pi_{b_0, D, K}$  satisfies

$$V_\pi \geq \frac{1-\alpha}{1+\alpha} \hat{V}_\pi - \frac{\alpha}{1+\alpha} \epsilon_{|\pi|}. \quad (4)$$

To complete the proof, we now give an upper bound on  $\epsilon_{|\pi|}$ . From Equation 2, we can solve for  $\epsilon_{|\pi|}$  to get  $\epsilon_i = \frac{R_{\max}}{\alpha(1-\gamma)} \cdot \frac{\ln(4/\tau) + \ln(i^2 |\Pi_i|)}{\alpha K}$ . For any  $\pi$  in  $\Pi_{b_0, D, K}$ , its size is at most  $KD$ , and  $i^2 |\Pi_i| \leq (i|A||Z|)^i \leq (KD|A||Z|)^i$  by Lemma 2. Thus we have

$$\epsilon_{|\pi|} \leq \frac{R_{\max}}{\alpha(1-\gamma)} \cdot \frac{\ln(4/\tau) + |\pi| \ln(KD|A||Z|)}{\alpha K}.$$

Combining this with Inequality (4), we get

$$V_\pi \geq \frac{1-\alpha}{1+\alpha} \hat{V}_\pi - \frac{R_{\max}}{(1+\alpha)(1-\gamma)} \cdot \frac{\ln(4/\tau) + |\pi| \ln(KD|A||Z|)}{\alpha K}.$$

This completes the proof.  $\square$

## 2 Proof of Theorem 2

We need the following lemma for proving Theorem 2.

**Lemma 3** For a fixed policy  $\pi$  and any  $\tau \in (0, 1)$ , with probability at least  $1 - \tau$ .

$$\hat{V}_\pi \geq V_\pi - \frac{R_{\max}}{1-\gamma} \sqrt{\frac{2 \ln(1/\tau)}{K}}$$

**Proof.** Let  $\pi$  be a policy and  $V_\pi$  and  $\hat{V}_\pi$  as mentioned. Hoeffding's inequality [4] gives us

$$\Pr \left( \hat{V}_\pi \geq V_\pi - \epsilon \right) \geq 1 - e^{-K\epsilon^2/(2M^2)}$$

Let  $\tau = e^{-K\epsilon^2/(2M^2)}$  and solve for  $\epsilon$ , then we get

$$\Pr \left( \hat{V}_\pi \geq V_\pi - \frac{R_{\max}}{1-\gamma} \sqrt{\frac{2\ln(1/\tau)}{K}} \right) \geq 1 - \tau.$$

□

**Theorem 2** Let  $\pi^*$  be an optimal policy at a belief  $b_0$ . Let  $\pi$  be a policy derived from a DESPOT that has height  $D$  and are constructed from  $K$  randomly sampled scenarios for belief  $b_0$ . For any  $\tau, \alpha \in (0, 1)$ , if  $\pi$  maximizes

$$\frac{1-\alpha}{1+\alpha} \hat{V}_\pi(b_0) - \frac{R_{\max}}{(1+\alpha)(1-\gamma)} \cdot \frac{|\pi| \ln(KD|A||Z|)}{\alpha K}, \quad (5)$$

among all policies derived from the DESPOT, then

$$V_\pi(b_0) \geq \frac{1-\alpha}{1+\alpha} V_{\pi^*}(b_0) - \frac{R_{\max}}{(1+\alpha)(1-\gamma)} \left( \frac{\ln(8/\tau) + |\pi^*| \ln(KD|A||Z|)}{\alpha K} + (1-\alpha) \left( \sqrt{\frac{2\ln(2/\tau)}{K}} + \gamma^D \right) \right). \quad (6)$$

**Proof.** By Theorem 1, with probability at least  $1 - \tau/2$ ,

$$V_\pi \geq \frac{1-\alpha}{1+\alpha} \hat{V}_\pi - \frac{R_{\max}}{(1+\alpha)(1-\gamma)} \left[ \frac{\ln(8/\tau) + |\pi| \ln(KD|A||Z|)}{\alpha K} \right].$$

Suppose the above inequality holds on a random set of  $K$  scenarios. Note that there is a  $\pi' \in \Pi_{b_0, D, K}$  which is a subtree of  $\pi^*$  and has the same trajectories on these scenarios up to depth  $D$ . By the choice of  $\pi$  in Inequality (5), it follows that with probability at least  $1 - \tau/2$ ,

$$V_\pi \geq \frac{1-\alpha}{1+\alpha} \hat{V}_{\pi'} - \frac{R_{\max}}{(1+\alpha)(1-\gamma)} \left[ \frac{\ln(8/\tau) + |\pi'| \ln(KD|A||Z|)}{\alpha K} \right].$$

Note that  $|\pi^*| \geq |\pi'|$ , and  $\hat{V}_{\pi'} \geq \hat{V}_{\pi^*} - \gamma^D R_{\max}/(1-\gamma)$  since  $\pi'$  and  $\pi^*$  only differ from depth  $D$  onwards, under the chosen scenarios. It follows that with probability at least  $1 - \tau/2$ ,

$$V_\pi \geq \frac{1-\alpha}{1+\alpha} \left( \hat{V}_{\pi^*} - \gamma^D \frac{R_{\max}}{1-\gamma} \right) - \frac{R_{\max}}{(1+\alpha)(1-\gamma)} \left[ \frac{\ln(8/\tau) + |\pi^*| \ln(KD|A||Z|)}{\alpha K} \right]. \quad (7)$$

By Lemma 3, with probability at least  $1 - \tau/2$ , we have

$$\hat{V}_{\pi^*} \geq V_{\pi^*} - \frac{R_{\max}}{1-\gamma} \sqrt{\frac{2\ln(2/\tau)}{K}}. \quad (8)$$

By the union bound, with probability at least  $1 - \tau$ , both Inequality (7) and Inequality (8) hold, which imply Inequality (6) holds. This completes the proof. □

## References

- [1] David Haussler. Decision Theoretic Generalizations of the PAC Model for Neural Net and Other Learning Applications. *Information and computation*, 100(1):78–150, 1992.
- [2] Yi Wang, Kok Sung Won, David Hsu, and Wee Sun Lee. Monte Carlo Bayesian Reinforcement Learning. *arXiv preprint arXiv:1206.6449*, 2012.
- [3] Arthur Cayley. A Theorem on Trees. *Quart. J. Math.*, 23(376-378):69, 1889.
- [4] Wassily Hoeffding. Probability Inequalities for Sums of Bounded Random Variables. *Journal of the American statistical association*, 58(301):13–30, 1963.
